# Supplementary material for: The effect of surface charge on nonspecific uptake and cytotoxicity of CdSe/ZnS core/shell quantum dots
Source: publisher site journal article supplement (doi:10.3762/bjnano.6.26), 2015-01-26
Supplement: Additional file 1 [file 2190-4286-6-26-S1.pdf]

## Supporting information

for

### **The effect of surface charge on nonspecific uptake and cytotoxicity of CdSe/ZnS core/shell quantum dots**

Vladimir V. Breus<sup>1</sup>, Anna Pietuch<sup>2</sup>, Marco Tarantola<sup>3</sup>, Thomas Basché\*<sup>1</sup> and Andreas Janshoff\*<sup>2</sup>

Address: <sup>1</sup>Institute of Physical Chemistry, Johannes Gutenberg University Mainz, Jakob-Welder-Weg 11, 55128 Mainz, Germany, <sup>2</sup>Institute of Physical Chemistry, University of Goettingen, Tammannstr. 6, 37077 Goettingen, Germany and <sup>3</sup>Max-Planck-Institute for Dynamics and Self-Organization (MPIDS), Laboratory for Fluid Dynamics, Pattern Formation and Biocomplexity, Am Fassberg 17, 37077 Goettingen, Germany

Email: Andreas Janshoff - [ajansho@gwdg.de](mailto:ajansho@gwdg.de); Thomas Basché - [basche@uni-mainz.de](mailto:basche@uni-mainz.de)

\* Corresponding author

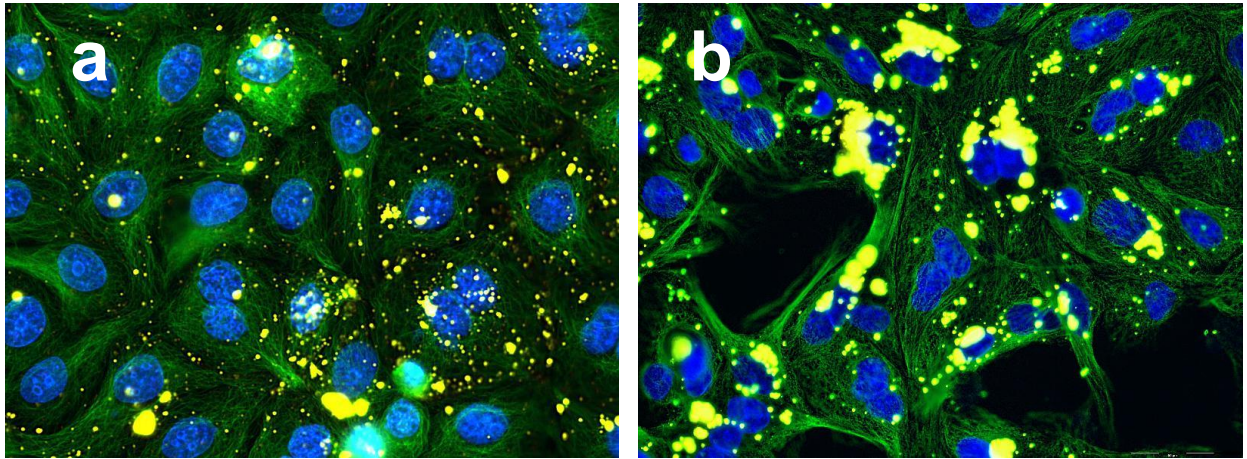

**Figure S1:** Fluorescence micrographs of MDCKII cell layer regions containing overgrown 2-nuclei cells as a result of 24 h exposure to 50 nM solutions of (a) MPA-coated and (b) DPA-coated CdSe/ZnS QDs (blue channel: DAPI-stained nuclei; green channel: Alexa Fluor 488-stained microtubules; yellow channel: QDs).

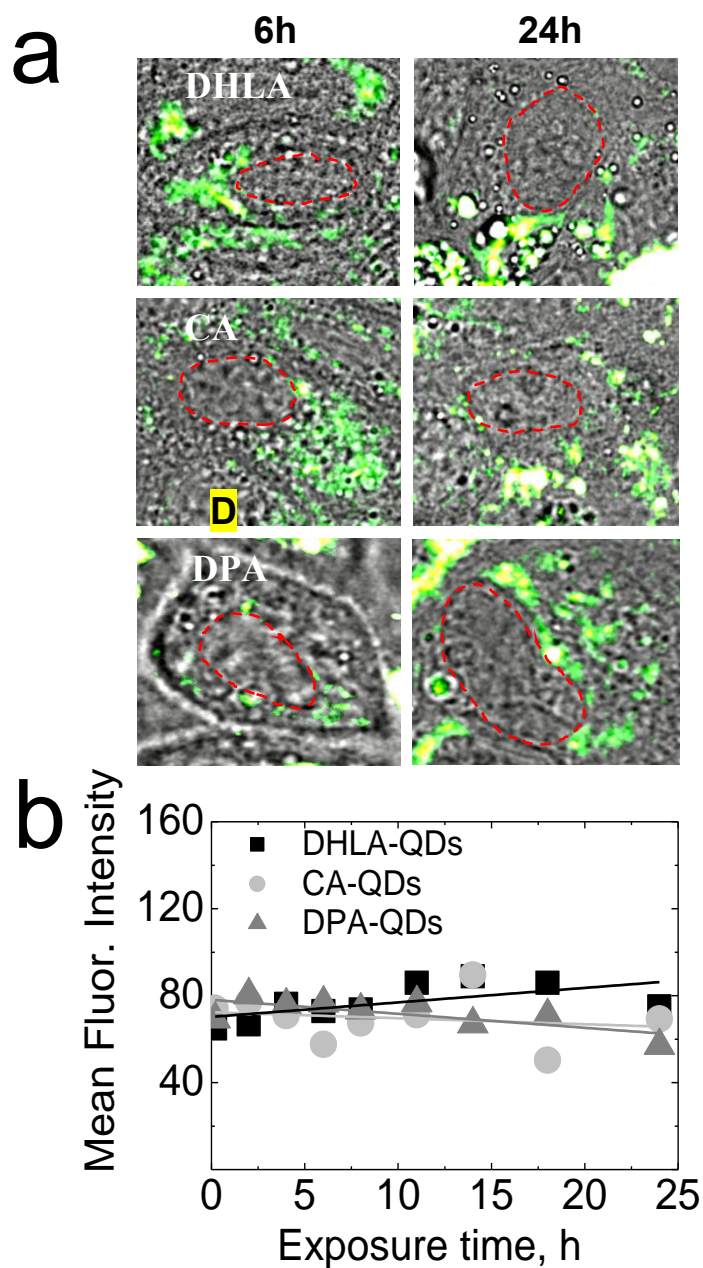

**Figure S2:** (a) Overlay of fluorescence with transmission images of CA-, DHLA-, CA- and DPA-functionalized CdSe/ZnS quantum dots taken at 6 and 24 h after exposure to MDCKII cells. (b) Mean fluorescence intensity in the nuclei of MDCKII cells upon 24 hours of interaction with CA-, DHLA-, and DPA-coated QDs. Straight lines are linear fits.

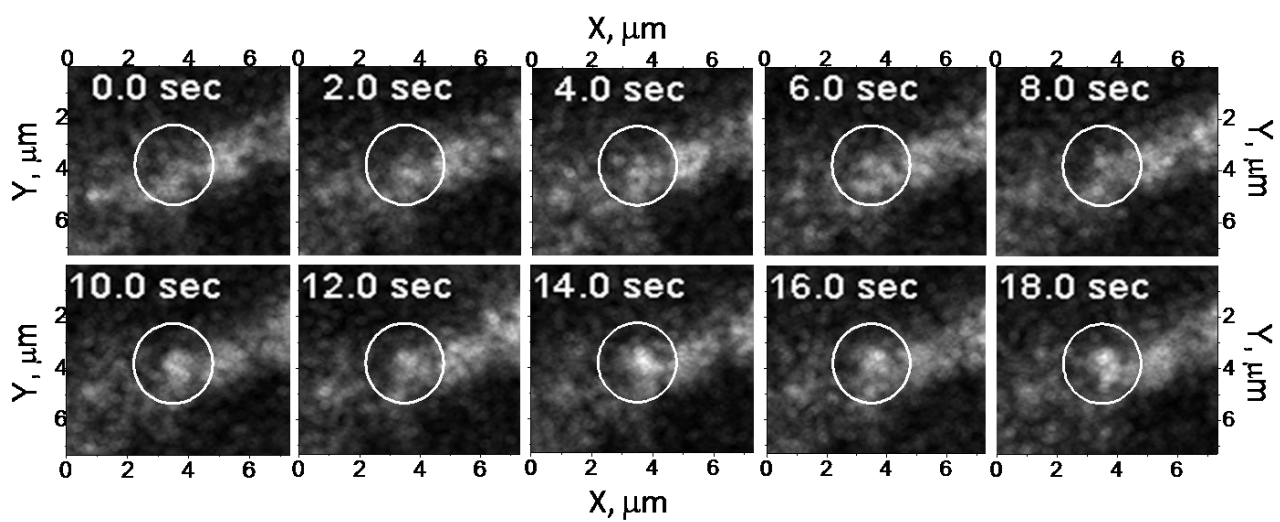

**Figure S3:** Formation of QD-containing vesicles from the MDCKII plasma membrane after 2 h of exposure to CA-QDs.

Recorded 20 frames sequence (4 sec exposure time for each frame)

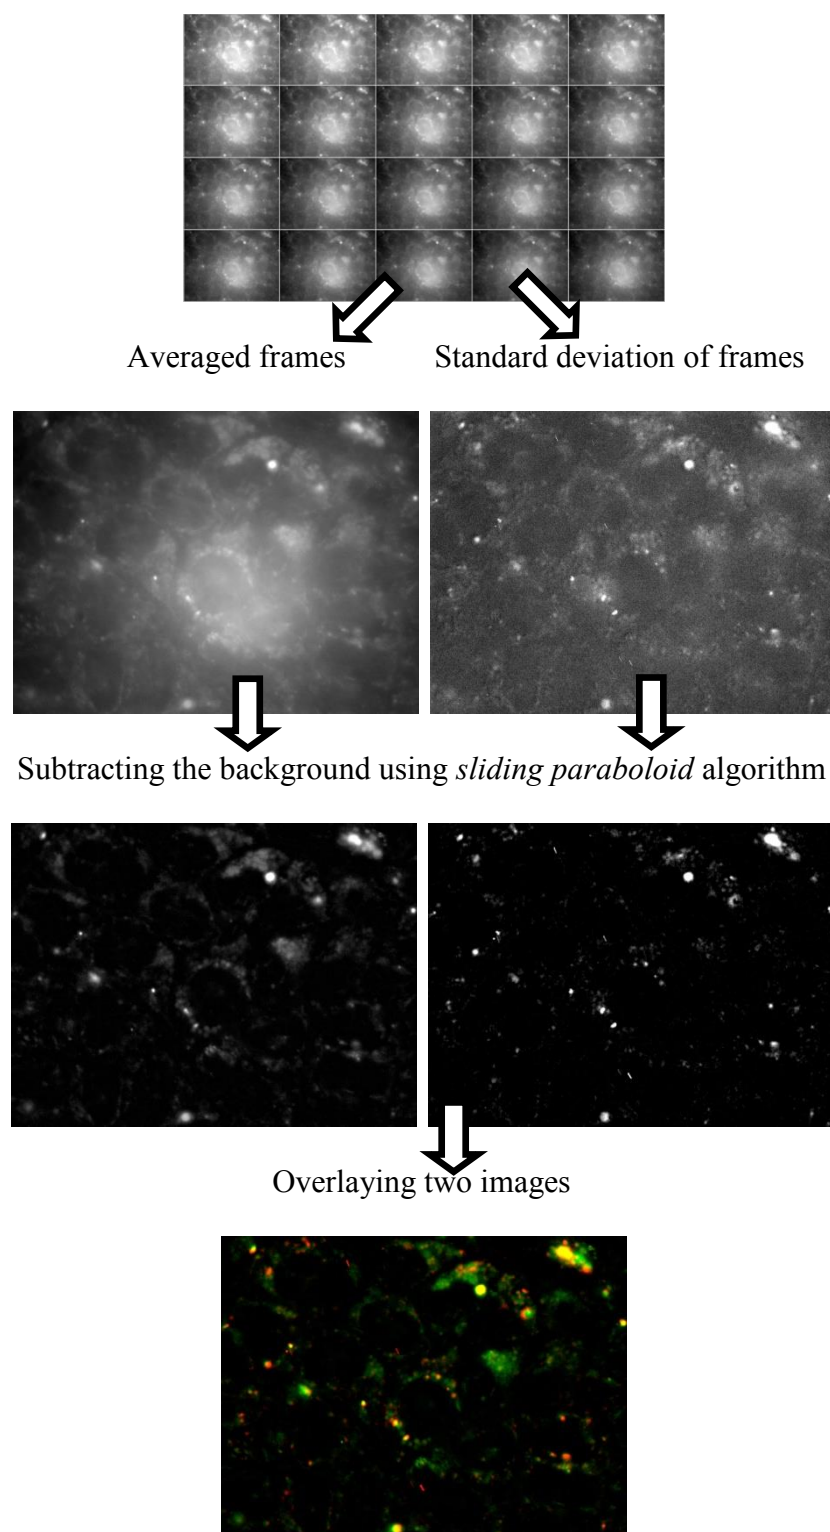

**Figure S4:** Image post-processing. Standard deviation of a frame sequence contain only fluorescent spots which change their position during 80 s ( $20 \times 4$  s) scan, while the averaged signal contains both QD and amplified cell fluorescence. All image processing was performed with ImageJ 1.40g open source software (Wayne Rasband, National Institutes of Health, USA).
